# Supplementary material for: Current progress in chimeric antigen receptor T cell therapy for glioblastoma multiforme
Source: PubMed Central journal article supplement (PMC8335808; doi:10.1002/cam4.4064), 2021-06-19
Supplement: CAM4-10-5019-s001.pdf [file CAM4-10-5019-s001.pdf]

ClinicalTrials.gov Search Results 03/13/2021

| NCT Number | Title       | Other Names                                                                                                                             | Status                                                       | Conditions     | Interventions                                                              | Characteristics                                                                                                                                       | Population                                                                                                                                                                                                                                                                                                                                                                                                                                                                                                                                                                                                                                                                                                                           | Sponsor/ Collaborators                                                                      | Funder Type                                                                                                              | Dates                                                                       | Locations                                                                                                                                                                                                                        |                                                                                                                    |
|------------|-------------|-----------------------------------------------------------------------------------------------------------------------------------------|--------------------------------------------------------------|----------------|----------------------------------------------------------------------------|-------------------------------------------------------------------------------------------------------------------------------------------------------|--------------------------------------------------------------------------------------------------------------------------------------------------------------------------------------------------------------------------------------------------------------------------------------------------------------------------------------------------------------------------------------------------------------------------------------------------------------------------------------------------------------------------------------------------------------------------------------------------------------------------------------------------------------------------------------------------------------------------------------|---------------------------------------------------------------------------------------------|--------------------------------------------------------------------------------------------------------------------------|-----------------------------------------------------------------------------|----------------------------------------------------------------------------------------------------------------------------------------------------------------------------------------------------------------------------------|--------------------------------------------------------------------------------------------------------------------|
| 1          | NCT02844062 | <p><a href="#">Pilot Study of Autologous Anti-EGFRvIII CAR T Cells in Recurrent Glioblastoma Multiforme</a></p> <p>Study Documents:</p> | <p>Title Acronym:</p> <p>Other Ids:<br/>SBNK-2016-015-01</p> | Unknown status | <ul style="list-style-type: none"> <li>•Glioblastoma Multiforme</li> </ul> | <ul style="list-style-type: none"> <li>•Biological: anti-EGFRvIII CAR T cells</li> <li>•Drug: cyclophosphamide</li> <li>•Drug: Fludarabine</li> </ul> | <p>Study Type: Interventional</p> <p>Phase: Phase 1</p> <p>Study Design:</p> <ul style="list-style-type: none"> <li>•Allocation: N/A</li> <li>•Intervention Model: Single Group Assignment</li> <li>•Masking: None (Open Label)</li> <li>•Primary Purpose: Treatment</li> </ul> <p>Outcome Measures:</p> <ul style="list-style-type: none"> <li>•Safety of infusion of autologous anti-EGFRvIII CAR T cells with cyclophosphamide and fludarabine as lymphodepleting chemotherapy in patients with recurrent glioblastoma using the NCI CTCAE V4.0 criteria.</li> <li>•Treatment Responses Rate</li> <li>•Overall Survival Rate</li> <li>•Progression-free Survival Rate</li> <li>•Persistence of CAR T cells in patients</li> </ul> | <p>Enrollment: 20</p> <p>Age: 18 Years to 70 Years (Adult, Older Adult)</p> <p>Sex: All</p> | <ul style="list-style-type: none"> <li>•Beijing Sanbo Brain Hospital</li> <li>•Marino Biotechnology Co., Ltd.</li> </ul> | <ul style="list-style-type: none"> <li>•Other</li> <li>•Industry</li> </ul> | <p>Study Start: July 2016</p> <p>Primary Completion: July 2018</p> <p>Study Completion: July 2019</p> <p>First Posted: July 26, 2016</p> <p>Results First Posted: No Results Posted</p> <p>Last Update Posted: July 26, 2016</p> | <ul style="list-style-type: none"> <li>•Sanbo Brain Hospital Capital Medical University, Beijing, China</li> </ul> |

| NCT Number | Title       | Other Names                                                                                                                        | Status                                               | Conditions         | Interventions                                       | Characteristics                           | Population                                                                                                                                                                                                                                                                                                                                                                                                                                                          | Sponsor/ Collaborators                                                                        | Funder Type                                                                                                          | Dates     | Locations                                                                                                                                                                                                                                                                  |                                                                                                      |
|------------|-------------|------------------------------------------------------------------------------------------------------------------------------------|------------------------------------------------------|--------------------|-----------------------------------------------------|-------------------------------------------|---------------------------------------------------------------------------------------------------------------------------------------------------------------------------------------------------------------------------------------------------------------------------------------------------------------------------------------------------------------------------------------------------------------------------------------------------------------------|-----------------------------------------------------------------------------------------------|----------------------------------------------------------------------------------------------------------------------|-----------|----------------------------------------------------------------------------------------------------------------------------------------------------------------------------------------------------------------------------------------------------------------------------|------------------------------------------------------------------------------------------------------|
| 2          | NCT04717999 | <a href="#">Pilot Study of NKG2D CAR-T in Treating Patients With Recurrent Glioblastoma</a><br><br>Study Documents:                | Title Acronym:<br><br>Other Ids:<br>UBP-P02-3001-GBM | Not yet recruiting | •Recurrent Glioblastoma                             | •Biological: NKG2D CAR-T                  | Study Type:<br>Interventional<br><br>Phase:<br>Not Applicable<br><br>Study Design:<br>•Allocation: N/A<br>•Intervention Model: Single Group Assignment<br>•Masking: None (Open Label)<br>•Primary Purpose: Treatment<br><br>Outcome Measures:<br>•Number of Participants who experience a Dose-Limiting Toxicity (DLT)<br>•Overall Response Rate<br>•Progression-free survival                                                                                      | Enrollment:<br>20<br><br>Age:<br>20 Years to 70 Years (Adult, Older Adult)<br><br>Sex:<br>All | •UWELL Biopharma                                                                                                     | •Industry | Study Start:<br>September 1, 2021<br><br>Primary Completion:<br>September 30, 2023<br><br>Study Completion:<br>December 31, 2023<br><br>First Posted:<br>January 22, 2021<br><br>Results First Posted:<br>No Results Posted<br><br>Last Update Posted:<br>January 22, 2021 |                                                                                                      |
| 3          | NCT04385173 | <a href="#">Pilot Study of B7-H3 CAR-T in Treating Patients With Recurrent and Refractory Glioblastoma</a><br><br>Study Documents: | Title Acronym:<br><br>Other Ids:<br>SAHZJU-BP102     | Recruiting         | •Recurrent Glioblastoma<br>•Refractory Glioblastoma | •Drug: B7-H3 CAR-T<br>•Drug: Temozolomide | Study Type:<br>Interventional<br><br>Phase:<br>Phase 1<br><br>Study Design:<br>•Allocation: N/A<br>•Intervention Model: Single Group Assignment<br>•Masking: None (Open Label)<br>•Primary Purpose: Treatment<br><br>Outcome Measures:<br>•Incidence and type of adverse events<br>•Maximum tolerated dose (MTD)<br>•Overall survival (OS)<br>•Progression-free survival (PFS)<br>•The pharmacokinetics (PK) of B7-H3 CAR-T<br>•Disease response (ORR, CR, PR, DOR) | Enrollment:<br>12<br><br>Age:<br>18 Years to 75 Years (Adult, Older Adult)<br><br>Sex:<br>All | •Second Affiliated Hospital, School of Medicine, Zhejiang University<br>•BoYuan RunSheng Pharma (Hangzhou) Co., Ltd. | •Other    | Study Start:<br>June 1, 2020<br><br>Primary Completion:<br>May 1, 2022<br><br>Study Completion:<br>July 1, 2022<br><br>First Posted:<br>May 12, 2020<br><br>Results First Posted:<br>No Results Posted<br><br>Last Update Posted:<br>May 12, 2020                          | •the Second Affiliated Hospital of Zhejiang University School of Medicine, Hangzhou, Zhejiang, China |

| NCT Number | Title                                                                                       | Other Names                                               | Status    | Conditions    | Interventions                                                        | Characteristics                                                                                                                                                                                                                                                                                                                                                                                                            | Population                                                                                 | Sponsor/ Collaborators      | Funder Type | Dates                                                                                                                                                                                                                                                               | Locations                                                                                            |
|------------|---------------------------------------------------------------------------------------------|-----------------------------------------------------------|-----------|---------------|----------------------------------------------------------------------|----------------------------------------------------------------------------------------------------------------------------------------------------------------------------------------------------------------------------------------------------------------------------------------------------------------------------------------------------------------------------------------------------------------------------|--------------------------------------------------------------------------------------------|-----------------------------|-------------|---------------------------------------------------------------------------------------------------------------------------------------------------------------------------------------------------------------------------------------------------------------------|------------------------------------------------------------------------------------------------------|
| 4          | NCT03726515<br><a href="#">CART-EGFRvIII + Pembrolizumab in GBM</a><br><br>Study Documents: | Title Acronym:<br><br>Other Ids:<br>831706, UPCC<br>13318 | Completed | •Glioblastoma | •Biological: CART-EGFRvIII T cells<br><br>•Biological: Pembrolizumab | Study Type:<br>Interventional<br><br>Phase:<br>Phase 1<br><br>Study Design:<br>•Allocation: N/A<br>•Intervention Model: Single Group Assignment<br>•Masking: None (Open Label)<br>•Primary Purpose: Treatment<br><br>Outcome Measures:<br>•Number of subjects with treatment-related adverse events, using NCI CTCAE v5.0.<br>•Overall survival Rate<br>•Progression-free survival (PFS)<br>•Objective response rate (ORR) | Enrollment:<br>7<br><br>Age:<br>18 Years and older (Adult, Older Adult)<br><br>Sex:<br>All | •University of Pennsylvania | •Other      | Study Start:<br>March 11, 2019<br><br>Primary Completion:<br>February 27, 2021<br><br>Study Completion:<br>February 27, 2021<br><br>First Posted:<br>October 31, 2018<br><br>Results First Posted:<br>No Results Posted<br><br>Last Update Posted:<br>March 3, 2021 | •Abramson Cancer Center of the University of Pennsylvania, Philadelphia, Pennsylvania, United States |

| NCT Number | Title                                                                                                       | Other Names                                          | Status     | Conditions                                                                                                  | Interventions                                                                                           | Characteristics                                                                                                                                                                                                                                                                                                                                                                                                                                                                                                                                                                                                                                                                                                                                                                                | Population                                                                                                          | Sponsor/ Collaborators                                                                                                                                                                                                                                               | Funder Type | Dates                                                                                                                                                                                                                                                                                             | Locations                                                                                                                                                                                                                                                                             |
|------------|-------------------------------------------------------------------------------------------------------------|------------------------------------------------------|------------|-------------------------------------------------------------------------------------------------------------|---------------------------------------------------------------------------------------------------------|------------------------------------------------------------------------------------------------------------------------------------------------------------------------------------------------------------------------------------------------------------------------------------------------------------------------------------------------------------------------------------------------------------------------------------------------------------------------------------------------------------------------------------------------------------------------------------------------------------------------------------------------------------------------------------------------------------------------------------------------------------------------------------------------|---------------------------------------------------------------------------------------------------------------------|----------------------------------------------------------------------------------------------------------------------------------------------------------------------------------------------------------------------------------------------------------------------|-------------|---------------------------------------------------------------------------------------------------------------------------------------------------------------------------------------------------------------------------------------------------------------------------------------------------|---------------------------------------------------------------------------------------------------------------------------------------------------------------------------------------------------------------------------------------------------------------------------------------|
| 5          | NCT04077866<br><a href="#">B7-H3 CAR-T for Recurrent or Refractory Glioblastoma</a><br><br>Study Documents: | Title Acronym:<br><br>Other Ids:<br>SAHZJU-RCT-BP102 | Recruiting | <ul style="list-style-type: none"> <li>•Recurrent Glioblastoma</li> <li>•Refractory Glioblastoma</li> </ul> | <ul style="list-style-type: none"> <li>•Drug: Temozolomide</li> <li>•Biological: B7-H3 CAR-T</li> </ul> | <p>Study Type:<br/>Interventional</p> <hr/> <p>Phase:</p> <ul style="list-style-type: none"> <li>•Phase 1</li> <li>•Phase 2</li> </ul> <hr/> <p>Study Design:</p> <ul style="list-style-type: none"> <li>•Allocation: Randomized</li> <li>•Intervention Model: Parallel Assignment</li> <li>•Masking: None (Open Label)</li> <li>•Primary Purpose: Treatment</li> </ul> <hr/> <p>Outcome Measures:</p> <ul style="list-style-type: none"> <li>•Overall survival (OS)</li> <li>•Incidence and type of adverse events</li> <li>•Maximum tolerated dose (MTD)</li> <li>•Progression-free survival (PFS)</li> <li>•Peak Concentration (Cmax) of B7-H3 CAR-T</li> <li>•Area under the concentration versus time curve (AUC) of B7-H3 CAR-T</li> <li>•Disease response (ORR, CR, PR, DOR)</li> </ul> | <p>Enrollment:<br/>40</p> <hr/> <p>Age:<br/>18 Years to 75 Years (Adult, Older Adult)</p> <hr/> <p>Sex:<br/>All</p> | <ul style="list-style-type: none"> <li>•Second Affiliated Hospital, School of Medicine, Zhejiang University</li> <li>•Ningbo Yinzhou People's Hospital</li> <li>•Huizhou Municipal Central Hospital</li> <li>•BoYuan RunSheng Pharma (Hangzhou) Co., Ltd.</li> </ul> | •Other      | <p>Study Start:<br/>May 1, 2022</p> <hr/> <p>Primary Completion:<br/>June 1, 2024</p> <hr/> <p>Study Completion:<br/>July 1, 2024</p> <hr/> <p>First Posted:<br/>September 4, 2019</p> <hr/> <p>Results First Posted:<br/>No Results Posted</p> <hr/> <p>Last Update Posted:<br/>May 19, 2020</p> | <ul style="list-style-type: none"> <li>•the Second Affiliated Hospital of Zhejiang University School of Medicine, Hangzhou, Zhejiang, China</li> <li>•Huzhou Central Hospital, Huzhou, Zhejiang, China</li> <li>•Ningbo Yinzhou People's Hospital, Ningbo, Zhejiang, China</li> </ul> |

| NCT Number | Title                                                                                                                                                                                                     | Other Names                                                   | Status     | Conditions                                                                                                                                                                                      | Interventions                                                                                                                   | Characteristics                                                                                                                                                                                                                                                                                                                                                                                                                                                                                                                                                                                                                                                                                                                                                                                           | Population                                                                                            | Sponsor/ Collaborators                                                                                                   | Funder Type                                                            | Dates                                                                                                                                                                                                                                                                          | Locations                                                                                                         |
|------------|-----------------------------------------------------------------------------------------------------------------------------------------------------------------------------------------------------------|---------------------------------------------------------------|------------|-------------------------------------------------------------------------------------------------------------------------------------------------------------------------------------------------|---------------------------------------------------------------------------------------------------------------------------------|-----------------------------------------------------------------------------------------------------------------------------------------------------------------------------------------------------------------------------------------------------------------------------------------------------------------------------------------------------------------------------------------------------------------------------------------------------------------------------------------------------------------------------------------------------------------------------------------------------------------------------------------------------------------------------------------------------------------------------------------------------------------------------------------------------------|-------------------------------------------------------------------------------------------------------|--------------------------------------------------------------------------------------------------------------------------|------------------------------------------------------------------------|--------------------------------------------------------------------------------------------------------------------------------------------------------------------------------------------------------------------------------------------------------------------------------|-------------------------------------------------------------------------------------------------------------------|
| 6          | NCT04214392<br><a href="#">Chimeric Antigen Receptor (CAR) T Cells With a Chlorotoxin Tumor-Targeting Domain for the Treatment of MPP2+ Recurrent or Progressive Glioblastoma</a><br><br>Study Documents: | Title Acronym:<br><br>Other Ids:<br>•19309<br>•NCI-2019-08393 | Recruiting | <ul style="list-style-type: none"> <li>•Recurrent Glioblastoma</li> <li>•Recurrent Malignant Glioma</li> <li>•Recurrent WHO Grade II Glioma</li> <li>•Recurrent WHO Grade III Glioma</li> </ul> | <ul style="list-style-type: none"> <li>•Biological: Chlorotoxin (EQ)-CD28-CD3zeta-CD19t-expressing CAR T-lymphocytes</li> </ul> | <p>Study Type:<br/>Interventional</p> <p>Phase:<br/>Phase 1</p> <p>Study Design:</p> <ul style="list-style-type: none"> <li>•Allocation: N/A</li> <li>•Intervention Model: Single Group Assignment</li> <li>•Masking: None (Open Label)</li> <li>•Primary Purpose: Treatment</li> </ul> <p>Outcome Measures:</p> <ul style="list-style-type: none"> <li>•Dose limiting toxicity (DLT)</li> <li>•Chimeric antigen receptor (CAR) T cell</li> <li>•Endogenous T cell</li> <li>•Cytokine levels in TCF, PB and CSF</li> <li>•Progression free survival time</li> <li>•Disease response</li> <li>•Overall survival (OS)</li> <li>•CAR T cells detected in tumor tissue</li> <li>•Chlorotoxin-targeted antigen expression levels in tumor tissue</li> <li>•Biomathematical modeling of tumor growth</li> </ul> | <p>Enrollment:<br/>36</p> <p>Age:<br/>18 Years and older (Adult, Older Adult)</p> <p>Sex:<br/>All</p> | <ul style="list-style-type: none"> <li>•City of Hope Medical Center</li> <li>•National Cancer Institute (NCI)</li> </ul> | <ul style="list-style-type: none"> <li>•Other</li> <li>•NIH</li> </ul> | <p>Study Start:<br/>February 26, 2020</p> <p>Primary Completion:<br/>February 6, 2023</p> <p>Study Completion:<br/>February 6, 2023</p> <p>First Posted:<br/>January 2, 2020</p> <p>Results First Posted:<br/>No Results Posted</p> <p>Last Update Posted:<br/>May 1, 2020</p> | <ul style="list-style-type: none"> <li>•City of Hope Medical Center, Duarte, California, United States</li> </ul> |

| NCT Number | Title       | Other Names                                                                                                                                                                                                                      | Status                                                   | Conditions | Interventions                                                                                      | Characteristics                                                                     | Population                                                                                                                                                                                                                                                                                                                                                                                                                                                                                                                                                            | Sponsor/ Collaborators                                                                        | Funder Type                                                                                    | Dates                                                    | Locations                                                                                                                                                                                                                                                           |                                                                                                                                                                         |
|------------|-------------|----------------------------------------------------------------------------------------------------------------------------------------------------------------------------------------------------------------------------------|----------------------------------------------------------|------------|----------------------------------------------------------------------------------------------------|-------------------------------------------------------------------------------------|-----------------------------------------------------------------------------------------------------------------------------------------------------------------------------------------------------------------------------------------------------------------------------------------------------------------------------------------------------------------------------------------------------------------------------------------------------------------------------------------------------------------------------------------------------------------------|-----------------------------------------------------------------------------------------------|------------------------------------------------------------------------------------------------|----------------------------------------------------------|---------------------------------------------------------------------------------------------------------------------------------------------------------------------------------------------------------------------------------------------------------------------|-------------------------------------------------------------------------------------------------------------------------------------------------------------------------|
| 7          | NCT02664363 | <a href="#">EGFRvIII CAR T Cells for Newly-Diagnosed WHO Grade IV Malignant Glioma</a><br><br>Study Documents:<br><ul style="list-style-type: none"> <li><a href="#">Study Protocol and Statistical Analysis Plan</a></li> </ul> | Title Acronym:<br>ExCeL<br><br>Other Ids:<br>Pro00069444 | Terminated | <ul style="list-style-type: none"> <li>•Glioblastoma</li> <li>•Gliosarcoma</li> </ul>              | <ul style="list-style-type: none"> <li>•Biological: EGFRvIII CAR T cells</li> </ul> | Study Type:<br>Interventional<br><br>Phase:<br>Phase 1<br><br>Study Design:<br><ul style="list-style-type: none"> <li>•Allocation: N/A</li> <li>•Intervention Model: Single Group Assignment</li> <li>•Masking: None (Open Label)</li> <li>•Primary Purpose: Treatment</li> </ul> Outcome Measures:<br><ul style="list-style-type: none"> <li>•Maximally Tolerated Dose</li> <li>•Number of Patients Who Experienced a Dose-limiting Toxicity (DLT)</li> </ul>                                                                                                        | Enrollment:<br>3<br><br>Age:<br>18 Years to 80 Years (Adult, Older Adult)<br><br>Sex:<br>All  | <ul style="list-style-type: none"> <li>•Gary Archer Ph.D.</li> <li>•Duke University</li> </ul> | <ul style="list-style-type: none"> <li>•Other</li> </ul> | Study Start:<br>February 1, 2017<br><br>Primary Completion:<br>September 25, 2018<br><br>Study Completion:<br>September 12, 2019<br><br>First Posted:<br>January 27, 2016<br><br>Results First Posted:<br>July 24, 2020<br><br>Last Update Posted:<br>July 24, 2020 | <ul style="list-style-type: none"> <li>•The Preston Robert Tisch Brain Tumor Center at Duke, Durham, North Carolina, United States</li> </ul>                           |
| 8          | NCT04045847 | <a href="#">CD147-CART Cells in Patients With Recurrent Malignant Glioma.</a><br><br>Study Documents:                                                                                                                            | Title Acronym:<br><br>Other Ids:<br>Chen Zhinan-2        | Recruiting | <ul style="list-style-type: none"> <li>•Recurrent Glioblastoma</li> <li>•CD147 Positive</li> </ul> | <ul style="list-style-type: none"> <li>•Biological: CD147-CART</li> </ul>           | Study Type:<br>Interventional<br><br>Phase:<br>Early Phase 1<br><br>Study Design:<br><ul style="list-style-type: none"> <li>•Allocation: N/A</li> <li>•Intervention Model: Single Group Assignment</li> <li>•Masking: None (Open Label)</li> <li>•Primary Purpose: Treatment</li> </ul> Outcome Measures:<br><ul style="list-style-type: none"> <li>•Incidence and type of adverse events induced by CD147-CART</li> <li>•DLT and MTD of CD147-CART cell</li> <li>•Clinical Activity of CD147-CART cell</li> <li>•CD147-CART detection in Peripheral Blood</li> </ul> | Enrollment:<br>31<br><br>Age:<br>18 Years to 65 Years (Adult, Older Adult)<br><br>Sex:<br>All | <ul style="list-style-type: none"> <li>•Xijing Hospital</li> </ul>                             | <ul style="list-style-type: none"> <li>•Other</li> </ul> | Study Start:<br>May 30, 2019<br><br>Primary Completion:<br>October 30, 2020<br><br>Study Completion:<br>May 30, 2022<br><br>First Posted:<br>August 6, 2019<br><br>Results First Posted:<br>No Results Posted<br><br>Last Update Posted:<br>May 7, 2020             | <ul style="list-style-type: none"> <li>•National Translational Science Center for Molecular Medicine &amp; Department of Cell Biology, Xi'an, Shaanxi, China</li> </ul> |

| NCT Number | Title                                                                                                                                                                                               | Other Names                                                                   | Status     | Conditions                                                                                                  | Interventions                                                                                                                                                                                                                                                                                                                             | Characteristics                                                                                                                                                                                                                                                                                                                                                                                                                                                                                                                                                                                                                                                                                                                               | Population                                                                                                          | Sponsor/ Collaborators                                                                                                   | Funder Type                                                            | Dates                                                                                                                                                                                                                                                                                                           | Locations                                                                                                         |
|------------|-----------------------------------------------------------------------------------------------------------------------------------------------------------------------------------------------------|-------------------------------------------------------------------------------|------------|-------------------------------------------------------------------------------------------------------------|-------------------------------------------------------------------------------------------------------------------------------------------------------------------------------------------------------------------------------------------------------------------------------------------------------------------------------------------|-----------------------------------------------------------------------------------------------------------------------------------------------------------------------------------------------------------------------------------------------------------------------------------------------------------------------------------------------------------------------------------------------------------------------------------------------------------------------------------------------------------------------------------------------------------------------------------------------------------------------------------------------------------------------------------------------------------------------------------------------|---------------------------------------------------------------------------------------------------------------------|--------------------------------------------------------------------------------------------------------------------------|------------------------------------------------------------------------|-----------------------------------------------------------------------------------------------------------------------------------------------------------------------------------------------------------------------------------------------------------------------------------------------------------------|-------------------------------------------------------------------------------------------------------------------|
| 9          | NCT04003649<br><a href="#">IL13Ralpha2-Targeted Chimeric Antigen Receptor (CAR) T Cells With or Without Nivolumab and Ipilimumab in Treating Patients With Recurrent or Refractory Glioblastoma</a> | Title Acronym:<br><br>Other Ids:<br>•18251<br>•NCI-2018-02764<br>•R01CA236500 | Recruiting | <ul style="list-style-type: none"> <li>•Recurrent Glioblastoma</li> <li>•Refractory Glioblastoma</li> </ul> | <ul style="list-style-type: none"> <li>•Biological: IL13Ralpha2-specific Hinge-optimized 4-1BB-co-stimulatory CAR/Truncated CD19-expressing Autologous TN/MEM Cells</li> <li>•Biological: Ipilimumab</li> <li>•Biological: Nivolumab</li> <li>•Other: Quality-of-Life Assessment</li> <li>•Other: Questionnaire Administration</li> </ul> | <p>Study Type:<br/>Interventional</p> <hr/> <p>Phase:<br/>Phase 1</p> <hr/> <p>Study Design:<br/>•Allocation: Randomized</p> <ul style="list-style-type: none"> <li>•Intervention Model: Parallel Assignment</li> <li>•Masking: None (Open Label)</li> <li>•Primary Purpose: Treatment</li> </ul> <hr/> <p>Outcome Measures:<br/>•Incidence of adverse events</p> <ul style="list-style-type: none"> <li>•Dose-limiting toxicity (DLT)</li> <li>•Feasibility (neoadjuvant therapy)</li> <li>•Feasibility (adjuvant therapy)</li> <li>•Survival</li> <li>•T cell levels</li> <li>•Cytokine levels in TCF, PB, and CSF</li> <li>•Disease response</li> <li>•Time to progression</li> <li>•Overall survival (OS)</li> <li>•and 7 more</li> </ul> | <p>Enrollment:<br/>60</p> <hr/> <p>Age:<br/>18 Years to 75 Years (Adult, Older Adult)</p> <hr/> <p>Sex:<br/>All</p> | <ul style="list-style-type: none"> <li>•City of Hope Medical Center</li> <li>•National Cancer Institute (NCI)</li> </ul> | <ul style="list-style-type: none"> <li>•Other</li> <li>•NIH</li> </ul> | <p>Study Start:<br/>September 26, 2019</p> <hr/> <p>Primary Completion:<br/>December 1, 2022</p> <hr/> <p>Study Completion:<br/>December 1, 2022</p> <hr/> <p>First Posted:<br/>July 1, 2019</p> <hr/> <p>Results First Posted:<br/>No Results Posted</p> <hr/> <p>Last Update Posted:<br/>December 9, 2020</p> | <ul style="list-style-type: none"> <li>•City of Hope Medical Center, Duarte, California, United States</li> </ul> |

| NCT Number | Title       | Other Names                                                                                                                                                                                 | Status                                                                                                                                                | Conditions | Interventions                                                                | Characteristics                                                                                                                                                                | Population                                                                                                                                                                                                                                                                                                                                                                                                                                                                                                                                                                                                                                                                                                                                                                                                                                                                                                                                                                                                                                                                                                                                                | Sponsor/ Collaborators                                                                                | Funder Type                                                                                                              | Dates                                                                  | Locations                                                                                                                                                                                                                                                                                     |                                                                                                                   |
|------------|-------------|---------------------------------------------------------------------------------------------------------------------------------------------------------------------------------------------|-------------------------------------------------------------------------------------------------------------------------------------------------------|------------|------------------------------------------------------------------------------|--------------------------------------------------------------------------------------------------------------------------------------------------------------------------------|-----------------------------------------------------------------------------------------------------------------------------------------------------------------------------------------------------------------------------------------------------------------------------------------------------------------------------------------------------------------------------------------------------------------------------------------------------------------------------------------------------------------------------------------------------------------------------------------------------------------------------------------------------------------------------------------------------------------------------------------------------------------------------------------------------------------------------------------------------------------------------------------------------------------------------------------------------------------------------------------------------------------------------------------------------------------------------------------------------------------------------------------------------------|-------------------------------------------------------------------------------------------------------|--------------------------------------------------------------------------------------------------------------------------|------------------------------------------------------------------------|-----------------------------------------------------------------------------------------------------------------------------------------------------------------------------------------------------------------------------------------------------------------------------------------------|-------------------------------------------------------------------------------------------------------------------|
| 10         | NCT04661384 | <p><a href="#">Brain Tumor-Specific Immune Cells (IL13Ralpha2-CAR T Cells) for the Treatment of Leptomeningeal Glioblastoma, Ependymoma, or Medulloblastoma</a></p> <p>Study Documents:</p> | <p>Title Acronym:</p> <hr/> <p>Other Ids:</p> <ul style="list-style-type: none"> <li>•19497</li> <li>•NCI-2020-06010</li> <li>•P30CA033572</li> </ul> | Recruiting | <ul style="list-style-type: none"> <li>•Leptomeningeal Metastases</li> </ul> | <ul style="list-style-type: none"> <li>•Biological: IL13Ralpha2-specific Hinge-optimized 41BB-co-stimulatory CAR Truncated CD19-expressing Autologous T-Lymphocytes</li> </ul> | <p>Study Type: Interventional</p> <hr/> <p>Phase: Phase 1</p> <hr/> <p>Study Design:</p> <ul style="list-style-type: none"> <li>•Allocation: N/A</li> <li>•Intervention Model: Single Group Assignment</li> <li>•Masking: None (Open Label)</li> <li>•Primary Purpose: Treatment</li> </ul> <hr/> <p>Outcome Measures:</p> <ul style="list-style-type: none"> <li>•Incidence of adverse events</li> <li>•Overall survival</li> <li>•CAR T cell levels detected in tumor cyst fluid (TCF), peripheral blood (PB), and cerebrospinal fluid (CSF)</li> <li>•Endogenous T cell levels detected in tumor cyst fluid (TCF), peripheral blood (PB), and cerebrospinal fluid (CSF)</li> <li>•Cell phenotype detected in tumor cyst fluid (TCF), peripheral blood (PB), and cerebrospinal fluid (CSF)</li> <li>•Cytokine levels in PB, TCF and CSF</li> <li>•Disease response</li> <li>•Time to progression</li> <li>•CAR T and endogenous cells detected in tumor tissue</li> <li>•IL13Ralpha2 antigen expression levels in tumor tissue.</li> <li>•Biomathematical Modeling of tumor growth</li> <li>•Biomathematical Modeling of perfusion/diffusion</li> </ul> | <p>Enrollment: 30</p> <hr/> <p>Age: 18 Years and older (Adult, Older Adult)</p> <hr/> <p>Sex: All</p> | <ul style="list-style-type: none"> <li>•City of Hope Medical Center</li> <li>•National Cancer Institute (NCI)</li> </ul> | <ul style="list-style-type: none"> <li>•Other</li> <li>•NIH</li> </ul> | <p>Study Start: February 15, 2021</p> <hr/> <p>Primary Completion: December 15, 2022</p> <hr/> <p>Study Completion: December 15, 2022</p> <hr/> <p>First Posted: December 10, 2020</p> <hr/> <p>Results First Posted: No Results Posted</p> <hr/> <p>Last Update Posted: January 27, 2021</p> | <ul style="list-style-type: none"> <li>•City of Hope Medical Center, Duarte, California, United States</li> </ul> |



| NCT Number | Title       | Other Names                                                                                                                        | Status                                                                            | Conditions     | Interventions                                         | Characteristics                                                                          | Population                                                                                                                                                                                                                                                                                                                                                                                   | Sponsor/ Collaborators                                                                        | Funder Type                                                                 | Dates               | Locations                                                                                                                                                                                                                                                    |                                                                                                                                                             |
|------------|-------------|------------------------------------------------------------------------------------------------------------------------------------|-----------------------------------------------------------------------------------|----------------|-------------------------------------------------------|------------------------------------------------------------------------------------------|----------------------------------------------------------------------------------------------------------------------------------------------------------------------------------------------------------------------------------------------------------------------------------------------------------------------------------------------------------------------------------------------|-----------------------------------------------------------------------------------------------|-----------------------------------------------------------------------------|---------------------|--------------------------------------------------------------------------------------------------------------------------------------------------------------------------------------------------------------------------------------------------------------|-------------------------------------------------------------------------------------------------------------------------------------------------------------|
| 11         | NCT02209376 | <a href="#">Autologous T Cells Redirected to EGFRVIII-With a Chimeric Antigen Receptor in Patients With EGFRVIII+ Glioblastoma</a> | Title Acronym:<br><br>Other Ids:<br>UPCC 35313,<br>820381<br><br>Study Documents: | Terminated     | •Patients With Residual or Recurrent EGFRVIII+ Glioma | •Biological: CART-EGFRVIII T cells                                                       | Study Type:<br>Interventional<br><br>Phase:<br>Phase 1<br><br>Study Design:<br>•Allocation: N/A<br>•Intervention Model: Single Group Assignment<br>•Masking: None (Open Label)<br>•Primary Purpose: Treatment<br><br>Outcome Measures:<br>Number of adverse events                                                                                                                           | Enrollment:<br>11<br><br>Age:<br>18 Years and older (Adult, Older Adult)<br><br>Sex:<br>All   | •University of Pennsylvania<br><br>•University of California, San Francisco | •Other              | Study Start:<br>November 18, 2014<br><br>Primary Completion:<br>April 4, 2018<br><br>Study Completion:<br>April 4, 2018<br><br>First Posted:<br>August 5, 2014<br><br>Results First Posted:<br>No Results Posted<br><br>Last Update Posted:<br>March 5, 2019 | •UCSF, San Francisco, California, United States<br><br>•Abramson Cancer Center of the University of Pennsylvania, Philadelphia, Pennsylvania, United States |
| 12         | NCT02937844 | <a href="#">Pilot Study of Autologous Chimeric Switch Receptor Modified T Cells in Recurrent Glioblastoma Multiforme</a>           | Title Acronym:<br><br>Other Ids:<br>SBNK-2016-016-01<br><br>Study Documents:      | Unknown status | •Glioblastoma Multiforme                              | •Biological: Anti-PD-L1 CSR T cells<br><br>•Drug: Cyclophosphamide<br>•Drug: Fludarabine | Study Type:<br>Interventional<br><br>Phase:<br>Phase 1<br><br>Study Design:<br>•Allocation: N/A<br>•Intervention Model: Single Group Assignment<br>•Masking: None (Open Label)<br>•Primary Purpose: Treatment<br><br>Outcome Measures:<br>•Number of Adverse Events related to CSR T cell infusion<br>•Treatment Responses Rate<br>•Overall Survival Rate<br>•Progression-free Survival Rate | Enrollment:<br>20<br><br>Age:<br>18 Years to 70 Years (Adult, Older Adult)<br><br>Sex:<br>All | •Beijing Sanbo Brain Hospital<br><br>•Marino Biotechnology Co., Ltd.        | •Other<br>•Industry | Study Start:<br>July 2016<br><br>Primary Completion:<br>July 2018<br><br>Study Completion:<br>July 2019<br><br>First Posted:<br>October 19, 2016<br><br>Results First Posted:<br>No Results Posted<br><br>Last Update Posted:<br>October 19, 2016            | •Sanbo Brain Hospital Capital Medical University, Beijing, China                                                                                            |

| NCT Number | Title                                                                                                        | Other Names                                                                       | Status    | Conditions                                            | Interventions              | Characteristics                                                                                                                                                                                                                                                                                                                                                                                                                                                 | Population                                                                                  | Sponsor/ Collaborators                                                                               | Funder Type    | Dates                                                                                                                                                                                                                                                                | Locations                                                              |
|------------|--------------------------------------------------------------------------------------------------------------|-----------------------------------------------------------------------------------|-----------|-------------------------------------------------------|----------------------------|-----------------------------------------------------------------------------------------------------------------------------------------------------------------------------------------------------------------------------------------------------------------------------------------------------------------------------------------------------------------------------------------------------------------------------------------------------------------|---------------------------------------------------------------------------------------------|------------------------------------------------------------------------------------------------------|----------------|----------------------------------------------------------------------------------------------------------------------------------------------------------------------------------------------------------------------------------------------------------------------|------------------------------------------------------------------------|
| 13         | NCT03283631<br><a href="#">Intracerebral EGFR-vIII CAR-T Cells for Recurrent GBM</a><br><br>Study Documents: | Title Acronym:<br>INTERCEPT<br><br>Other Ids:<br>•Pro00083828<br>•5P50CA190991-03 | Suspended | •Recurrent Glioblastoma<br><br>•Recurrent Gliosarcoma | •Biological: EGFRvIII-CARs | Study Type:<br>Interventional<br><br>Phase:<br>Phase 1<br><br>Study Design:<br>•Allocation: N/A<br>•Intervention Model: Single Group Assignment<br>•Masking: None (Open Label)<br>•Primary Purpose: Treatment<br><br>Outcome Measures:<br>•Determination of Maximum Tolerated Dose (MTD)<br>•Assessment of T Cell trafficking within the brain tumor<br>•Assessment of T cell trafficking systemically<br>•Median survival<br>•Median progression-free survival | Enrollment:<br>24<br><br>Age:<br>18 Years and older (Adult, Older Adult)<br><br>Sex:<br>All | •Gary Archer Ph.D.<br>•National Cancer Institute (NCI)<br>•Duke Cancer Institute<br>•Duke University | •Other<br>•NIH | Study Start:<br>May 30, 2018<br><br>Primary Completion:<br>December 31, 2021<br><br>Study Completion:<br>December 31, 2022<br><br>First Posted:<br>September 14, 2017<br><br>Results First Posted:<br>No Results Posted<br><br>Last Update Posted:<br>April 22, 2020 | •Duke University Medical Center, Durham, North Carolina, United States |

| NCT Number | Title                                                                                                                    | Other Names                                        | Status                  | Conditions                                                                                                            | Interventions                                                                             | Characteristics                                                                                                                                                                                                                                                                                                                                                                                                                                                                                                                                                                                                                                                                                                                                                                                                                                                 | Population                                                                                                               | Sponsor/ Collaborators                                                                    | Funder Type                                              | Dates                                                                                                                                                                                                                                                                                                 | Locations                                                                                                                                                                                                                              |
|------------|--------------------------------------------------------------------------------------------------------------------------|----------------------------------------------------|-------------------------|-----------------------------------------------------------------------------------------------------------------------|-------------------------------------------------------------------------------------------|-----------------------------------------------------------------------------------------------------------------------------------------------------------------------------------------------------------------------------------------------------------------------------------------------------------------------------------------------------------------------------------------------------------------------------------------------------------------------------------------------------------------------------------------------------------------------------------------------------------------------------------------------------------------------------------------------------------------------------------------------------------------------------------------------------------------------------------------------------------------|--------------------------------------------------------------------------------------------------------------------------|-------------------------------------------------------------------------------------------|----------------------------------------------------------|-------------------------------------------------------------------------------------------------------------------------------------------------------------------------------------------------------------------------------------------------------------------------------------------------------|----------------------------------------------------------------------------------------------------------------------------------------------------------------------------------------------------------------------------------------|
| 14         | NCT03170141<br><a href="#">Immunogene-modified T (IgT) Cells Against Glioblastoma Multiforme</a><br><br>Study Documents: | Title Acronym:<br><br>Other Ids:<br>GIMI-IRB-17003 | Enrolling by invitation | <ul style="list-style-type: none"> <li>•Glioblastoma Multiforme of Brain</li> <li>•Glioblastoma Multiforme</li> </ul> | <ul style="list-style-type: none"> <li>•Biological: Antigen-specific IgT cells</li> </ul> | <p>Study Type:<br/>Interventional</p> <hr/> <p>Phase:<br/>Phase 1</p> <hr/> <p>Study Design:</p> <ul style="list-style-type: none"> <li>•Allocation: N/A</li> <li>•Intervention Model: Single Group Assignment</li> <li>•Masking: None (Open Label)</li> <li>•Primary Purpose: Treatment</li> </ul> <hr/> <p>Outcome Measures:</p> <ul style="list-style-type: none"> <li>•Safety of infusion of autologous IgT cells with cyclophosphamide and fludarabine as lymphodepleting chemotherapy in patients with recurrent glioblastoma using the NCI CTCAE V4.0 criteria.</li> <li>•Treatment response rate of recurrent glioblastoma</li> <li>•Overall survival Rate</li> <li>•Progression-free survival rate</li> <li>•Persistence and proliferation of IgT cells in patients</li> <li>•Production of specific immune check point modulatory proteins</li> </ul> | <p>Enrollment:<br/>20</p> <hr/> <p>Age:<br/>1 Year to 80 Years (Child, Adult, Older Adult)</p> <hr/> <p>Sex:<br/>All</p> | <ul style="list-style-type: none"> <li>•Shenzhen Geno-Immune Medical Institute</li> </ul> | <ul style="list-style-type: none"> <li>•Other</li> </ul> | <p>Study Start:<br/>May 31, 2019</p> <hr/> <p>Primary Completion:<br/>August 1, 2019</p> <hr/> <p>Study Completion:<br/>December 31, 2022</p> <hr/> <p>First Posted:<br/>May 30, 2017</p> <hr/> <p>Results First Posted:<br/>No Results Posted</p> <hr/> <p>Last Update Posted:<br/>March 3, 2021</p> | <ul style="list-style-type: none"> <li>•Shenzhen Geno-immune Medical Institute, Shenzhen, Guangdong, China</li> <li>•Department of Neurosurgery, Shenzhen Hospital, Southern Medical University, Shenzhen, Guangdong, China</li> </ul> |

| NCT Number | Title       | Other Names                                                                                                             | Status                                                       | Conditions | Interventions                                                                                                                                     | Characteristics                                                                                                | Population                                                                                                                                                                                                                                                                                                                                                                                                                                                                                                                                                                                                         | Sponsor/ Collaborators                                                                                  | Funder Type                                                                                              | Dates                                                   | Locations                                                                                                                                                                                                                                                                          |                                                                                                                        |
|------------|-------------|-------------------------------------------------------------------------------------------------------------------------|--------------------------------------------------------------|------------|---------------------------------------------------------------------------------------------------------------------------------------------------|----------------------------------------------------------------------------------------------------------------|--------------------------------------------------------------------------------------------------------------------------------------------------------------------------------------------------------------------------------------------------------------------------------------------------------------------------------------------------------------------------------------------------------------------------------------------------------------------------------------------------------------------------------------------------------------------------------------------------------------------|---------------------------------------------------------------------------------------------------------|----------------------------------------------------------------------------------------------------------|---------------------------------------------------------|------------------------------------------------------------------------------------------------------------------------------------------------------------------------------------------------------------------------------------------------------------------------------------|------------------------------------------------------------------------------------------------------------------------|
| 15         | NCT04270461 | <a href="#">NKG2D-based CAR T-cells Immunotherapy for Patient With r/r NKG2DL+ Solid Tumors</a><br><br>Study Documents: | Title Acronym:<br>JiujiangUH<br><br>Other Ids:<br>JiujiangUH | Withdrawn  | <ul style="list-style-type: none"> <li>Hepatocellular Carcinoma</li> <li>Glioblastoma</li> <li>Medulloblastoma</li> <li>Colon Cancer</li> </ul>   | <ul style="list-style-type: none"> <li>Biological: NKG2D-based CAR T-cells</li> </ul>                          | <p>Study Type:<br/>Interventional</p> <p>Phase:<br/>Phase 1</p> <p>Study Design:</p> <ul style="list-style-type: none"> <li>Allocation: N/A</li> <li>Intervention Model: Single Group Assignment</li> <li>Masking: None (Open Label)</li> <li>Primary Purpose: Treatment</li> </ul> <p>Outcome Measures:</p> <ul style="list-style-type: none"> <li>Number of Participants with severe cytokine release syndrome(CRS) as a Measure of Safety and Tolerability.</li> <li>Copies numbers of CAR</li> <li>overall survival (OS)</li> <li>Progress Free Survival (PFS)</li> <li>Duration of response, (DoR)</li> </ul> | <p>Enrollment:<br/>0</p> <p>Age:<br/>18 Years to 75 Years (Adult, Older Adult)</p> <p>Sex:<br/>All</p>  | <ul style="list-style-type: none"> <li>Jiujiang University Affiliated Hospital</li> <li>KAEDI</li> </ul> | <ul style="list-style-type: none"> <li>Other</li> </ul> | <p>Study Start:<br/>March 17, 2020</p> <p>Primary Completion:<br/>October 17, 2020</p> <p>Study Completion:<br/>October 17, 2020</p> <p>First Posted:<br/>February 17, 2020</p> <p>Results First Posted:<br/>No Results Posted</p> <p>Last Update Posted:<br/>October 22, 2020</p> | <ul style="list-style-type: none"> <li>Affiliated hospital of jiujiang university, Jiujiang, Jiangxi, China</li> </ul> |
| 16         | NCT03392545 | <a href="#">Combination of Immunization and Radiotherapy for Malignant Gliomas (InSituVac1)</a><br><br>Study Documents: | Title Acronym:<br>InSituVac1<br><br>Other Ids:<br>B0011      | Recruiting | <ul style="list-style-type: none"> <li>High Grade Glioma</li> <li>Glioblastoma</li> <li>Glioma of Brainstem</li> <li>Glioma, Malignant</li> </ul> | <ul style="list-style-type: none"> <li>Combination Product: Combined immune adjuvants and radiation</li> </ul> | <p>Study Type:<br/>Interventional</p> <p>Phase:<br/>Phase 1</p> <p>Study Design:</p> <ul style="list-style-type: none"> <li>Allocation: N/A</li> <li>Intervention Model: Single Group Assignment</li> <li>Masking: None (Open Label)</li> <li>Primary Purpose: Treatment</li> </ul> <p>Outcome Measures:</p> <ul style="list-style-type: none"> <li>Incidence of Treatment-related Adverse Events</li> <li>Progression-free Survival</li> <li>Overall Survival</li> </ul>                                                                                                                                          | <p>Enrollment:<br/>30</p> <p>Age:<br/>18 Years to 65 Years (Adult, Older Adult)</p> <p>Sex:<br/>All</p> | <ul style="list-style-type: none"> <li>Beijing Tiantan Hospital</li> <li>Duke University</li> </ul>      | <ul style="list-style-type: none"> <li>Other</li> </ul> | <p>Study Start:<br/>April 1, 2018</p> <p>Primary Completion:<br/>April 1, 2020</p> <p>Study Completion:<br/>June 1, 2020</p> <p>First Posted:<br/>January 8, 2018</p> <p>Results First Posted:<br/>No Results Posted</p> <p>Last Update Posted:<br/>July 11, 2019</p>              | <ul style="list-style-type: none"> <li>Beijing Tiantan Hospital, Beijing, Beijing, China</li> </ul>                    |

| NCT Number | Title       | Other Names                                                                                                                                                                                                                                                                                                               | Status                                                                                                                      | Conditions | Interventions                                                                                                                           | Characteristics                                                                                                                                                                                                                                   | Population                                                                                                                                                                                                                                                                                                                                                                                                                                                                                                                                                                                                                                                                                                                                                                                                                                                            | Sponsor/ Collaborators                                                                                  | Funder Type                                                                                                                                     | Dates | Locations                                                                                                                                                                                                                                                                          |                                                                                                                                                          |
|------------|-------------|---------------------------------------------------------------------------------------------------------------------------------------------------------------------------------------------------------------------------------------------------------------------------------------------------------------------------|-----------------------------------------------------------------------------------------------------------------------------|------------|-----------------------------------------------------------------------------------------------------------------------------------------|---------------------------------------------------------------------------------------------------------------------------------------------------------------------------------------------------------------------------------------------------|-----------------------------------------------------------------------------------------------------------------------------------------------------------------------------------------------------------------------------------------------------------------------------------------------------------------------------------------------------------------------------------------------------------------------------------------------------------------------------------------------------------------------------------------------------------------------------------------------------------------------------------------------------------------------------------------------------------------------------------------------------------------------------------------------------------------------------------------------------------------------|---------------------------------------------------------------------------------------------------------|-------------------------------------------------------------------------------------------------------------------------------------------------|-------|------------------------------------------------------------------------------------------------------------------------------------------------------------------------------------------------------------------------------------------------------------------------------------|----------------------------------------------------------------------------------------------------------------------------------------------------------|
| 17         | NCT01454596 | <p><a href="#">CAR T Cell Receptor Immunotherapy Targeting EGFRvIII for Patients With Malignant Gliomas Expressing EGFRvIII</a></p> <p>Study Documents:</p> <ul style="list-style-type: none"> <li><a href="#">Study Protocol and Statistical Analysis Plan</a></li> <li><a href="#">Informed Consent Form</a></li> </ul> | <p>Title Acronym:</p> <hr/> <p>Other Ids:</p> <ul style="list-style-type: none"> <li>•110266</li> <li>•11-C-0266</li> </ul> | Completed  | <ul style="list-style-type: none"> <li>•Malignant Glioma</li> <li>•Glioblastoma</li> <li>•Brain Cancer</li> <li>•Gliosarcoma</li> </ul> | <ul style="list-style-type: none"> <li>•Biological: Epidermal growth factor receptor(EGFRv)III Chimeric antigen receptor (CAR) transduced PBL</li> <li>•Drug: Aldesleukin</li> <li>•Drug: Fludarabine</li> <li>•Drug: Cyclophosphamide</li> </ul> | <p>Study Type: Interventional</p> <hr/> <p>Phase:</p> <ul style="list-style-type: none"> <li>•Phase 1</li> <li>•Phase 2</li> </ul> <hr/> <p>Study Design:</p> <ul style="list-style-type: none"> <li>•Allocation: Non-Randomized</li> <li>•Intervention Model: Sequential Assignment</li> <li>•Masking: None (Open Label)</li> <li>•Primary Purpose: Treatment</li> </ul> <hr/> <p>Outcome Measures:</p> <ul style="list-style-type: none"> <li>•Number of Treatment Related Adverse Events</li> <li>•Progression Free Survival</li> <li>•Number of Patients With an Objective Response</li> <li>•Circulating Chimeric Antigen Receptor (CAR+) Cells in Peripheral Blood at 1 Month Post Treatment</li> <li>•Number of Participants With Serious and Non-serious Adverse Events Assessed by the Common Terminology Criteria in Adverse Events (CTCAE v4.0)</li> </ul> | <p>Enrollment: 18</p> <hr/> <p>Age: 18 Years to 70 Years (Adult, Older Adult)</p> <hr/> <p>Sex: All</p> | <ul style="list-style-type: none"> <li>•National Cancer Institute (NCI)</li> <li>•National Institutes of Health Clinical Center (CC)</li> </ul> | •NIH  | <p>Study Start: May 16, 2012</p> <hr/> <p>Primary Completion: November 1, 2018</p> <hr/> <p>Study Completion: January 17, 2019</p> <hr/> <p>First Posted: October 19, 2011</p> <hr/> <p>Results First Posted: August 21, 2019</p> <hr/> <p>Last Update Posted: August 21, 2019</p> | <ul style="list-style-type: none"> <li>•National Institutes of Health Clinical Center, 9000 Rockville Pike, Bethesda, Maryland, United States</li> </ul> |

| NCT Number | Title       | Other Names                                                                                                                       | Status                                                               | Conditions | Interventions                                                                    | Characteristics                                                                          | Population                                                                                                                                                                                                                                                                                                                                                                                                                                                                                                                                                                                                                                                 | Sponsor/ Collaborators                                                            | Funder Type                                                                                                                                                                                  | Dates                                                    | Locations                                                                                                                                                                                                                                                      |                                                                                                                                                                                 |
|------------|-------------|-----------------------------------------------------------------------------------------------------------------------------------|----------------------------------------------------------------------|------------|----------------------------------------------------------------------------------|------------------------------------------------------------------------------------------|------------------------------------------------------------------------------------------------------------------------------------------------------------------------------------------------------------------------------------------------------------------------------------------------------------------------------------------------------------------------------------------------------------------------------------------------------------------------------------------------------------------------------------------------------------------------------------------------------------------------------------------------------------|-----------------------------------------------------------------------------------|----------------------------------------------------------------------------------------------------------------------------------------------------------------------------------------------|----------------------------------------------------------|----------------------------------------------------------------------------------------------------------------------------------------------------------------------------------------------------------------------------------------------------------------|---------------------------------------------------------------------------------------------------------------------------------------------------------------------------------|
| 18         | NCT01109095 | <a href="#">CMV-specific Cytotoxic T Lymphocytes Expressing CAR Targeting HER2 in Patients With GBM</a><br><hr/> Study Documents: | Title Acronym:<br>HERT-GBM<br><hr/> Other Ids:<br>H-24487 - HERT GBM | Completed  | <ul style="list-style-type: none"> <li>•Glioblastoma Multiforme (GBM)</li> </ul> | <ul style="list-style-type: none"> <li>•Biological: HER.CAR CMV-specific CTLs</li> </ul> | Study Type:<br>Interventional<br><hr/> Phase:<br>Phase 1<br><hr/> Study Design:<br><ul style="list-style-type: none"> <li>•Allocation: N/A</li> <li>•Intervention Model: Single Group Assignment</li> <li>•Masking: None (Open Label)</li> <li>•Primary Purpose: Treatment</li> </ul> <hr/> Outcome Measures:<br><ul style="list-style-type: none"> <li>•Number of subjects with dose limiting toxicity after CTL infusion</li> <li>•Decrease in tumor after the CTL infusion</li> <li>•Area under the growth curves (AUC) over time for T cell frequencies.</li> <li>•Impact of gene modified CTL on CMV-specific T lymphocyte immune response</li> </ul> | Enrollment:<br>16<br><hr/> Age:<br>Child, Adult, Older Adult<br><hr/> Sex:<br>All | <ul style="list-style-type: none"> <li>•Baylor College of Medicine</li> <li>•The Methodist Hospital System</li> <li>•Center for Cell and Gene Therapy, Baylor College of Medicine</li> </ul> | <ul style="list-style-type: none"> <li>•Other</li> </ul> | Study Start:<br>October 2010<br><hr/> Primary Completion:<br>June 2014<br><hr/> Study Completion:<br>March 7, 2018<br><hr/> First Posted:<br>April 22, 2010<br><hr/> Results First Posted:<br>No Results Posted<br><hr/> Last Update Posted:<br>April 25, 2019 | <ul style="list-style-type: none"> <li>•Houston Methodist Hospital, Houston, Texas, United States</li> <li>•Texas Children's Hospital, Houston, Texas, United States</li> </ul> |

| NCT Number | Title                                                                                                                                                  | Other Names                                                                                   | Status     | Conditions                                                                                                                                                                                                                                                                                                                                                 | Interventions                                                                                                                                                                                                                                                                                                                                                                                                                                                                                                                  | Characteristics                                                                                                                                                                                                                                                                                                                                                                                                                                                                                                                                                                                                                                                                                                                                                                                                                                                                                                                                                                                                                                                                                                                                                              | Population                                                                                                     | Sponsor/ Collaborators                                                                                                                                                | Funder Type                                                                               | Dates                                                                                                                                                                                                                                                                          | Locations                                                                                                                      |
|------------|--------------------------------------------------------------------------------------------------------------------------------------------------------|-----------------------------------------------------------------------------------------------|------------|------------------------------------------------------------------------------------------------------------------------------------------------------------------------------------------------------------------------------------------------------------------------------------------------------------------------------------------------------------|--------------------------------------------------------------------------------------------------------------------------------------------------------------------------------------------------------------------------------------------------------------------------------------------------------------------------------------------------------------------------------------------------------------------------------------------------------------------------------------------------------------------------------|------------------------------------------------------------------------------------------------------------------------------------------------------------------------------------------------------------------------------------------------------------------------------------------------------------------------------------------------------------------------------------------------------------------------------------------------------------------------------------------------------------------------------------------------------------------------------------------------------------------------------------------------------------------------------------------------------------------------------------------------------------------------------------------------------------------------------------------------------------------------------------------------------------------------------------------------------------------------------------------------------------------------------------------------------------------------------------------------------------------------------------------------------------------------------|----------------------------------------------------------------------------------------------------------------|-----------------------------------------------------------------------------------------------------------------------------------------------------------------------|-------------------------------------------------------------------------------------------|--------------------------------------------------------------------------------------------------------------------------------------------------------------------------------------------------------------------------------------------------------------------------------|--------------------------------------------------------------------------------------------------------------------------------|
| 19         | NCT02208362<br><a href="#">Genetically Modified T-cells in Treating Patients With Recurrent or Refractory Malignant Glioma</a><br><br>Study Documents: | Title Acronym:<br><br>Other Ids:<br>•13384<br>•NCI-2014-01488<br>•P30CA033572<br>•R01FD005129 | Recruiting | <ul style="list-style-type: none"> <li>•Recurrent Glioblastoma</li> <li>•Recurrent Malignant Glioma</li> <li>•Recurrent WHO Grade II Glioma</li> <li>•Recurrent WHO Grade III Glioma</li> <li>•Refractory Glioblastoma</li> <li>•Refractory Malignant Glioma</li> <li>•Refractory WHO Grade II Glioma</li> <li>•Refractory WHO Grade III Glioma</li> </ul> | <ul style="list-style-type: none"> <li>•Biological: IL13Ralpha2-specific Hinge-optimized 4-1BB-co-stimulatory CAR/Truncated CD19-expressing Autologous TN/ MEM Cells</li> <li>•Biological: IL13Ralpha2-specific Hinge-optimized 41BB-co-stimulatory CAR Truncated CD19-expressing Autologous T-Lymphocytes</li> <li>•Other: Laboratory Biomarker Analysis</li> <li>•Procedure: Magnetic Resonance Imaging</li> <li>•Procedure: Magnetic Resonance Spectroscopic Imaging</li> <li>•Other: Quality-of-Life Assessment</li> </ul> | <p>Study Type:<br/>Interventional</p> <p>Phase:<br/>Phase 1</p> <p>Study Design:</p> <ul style="list-style-type: none"> <li>•Allocation: Non-Randomized</li> <li>•Intervention Model: Parallel Assignment</li> <li>•Masking: None (Open Label)</li> <li>•Primary Purpose: Treatment</li> </ul> <p>Outcome Measures:</p> <ul style="list-style-type: none"> <li>•Incidence of grade 3 toxicity</li> <li>•Incidence of dose limiting toxicity (DLT), graded using National Cancer Institute (NCI) Common Toxicity Criteria for Adverse Events (CTCAE) version 4.0</li> <li>•Incidence of toxicities, graded using National Cancer Institute (NCI) Common Toxicity Criteria for Adverse Events (CTCAE) version 4.0 as well as the modified neurological grading system</li> <li>•Changes in largest length of tumor</li> <li>•Changes in cytokine levels</li> <li>•Changes in chimeric antigen receptor (CAR) T levels</li> <li>•Progression free survival (PFS)</li> <li>•Disease response by the Response Assessment in Neuro-Oncology criteria</li> <li>•Disease response (stratum 1 and 2)</li> <li>•CAR T cell detection (stratum 1 and 2)</li> <li>•and 6 more</li> </ul> | <p>Enrollment:<br/>92</p> <p>Age:<br/>12 Years to 75 Years (Child, Adult, Older Adult)</p> <p>Sex:<br/>All</p> | <ul style="list-style-type: none"> <li>•City of Hope Medical Center</li> <li>•National Cancer Institute (NCI)</li> <li>•Food and Drug Administration (FDA)</li> </ul> | <ul style="list-style-type: none"> <li>•Other</li> <li>•NIH</li> <li>•U.S. Fed</li> </ul> | <p>Study Start:<br/>May 18, 2015</p> <p>Primary Completion:<br/>January 18, 2022</p> <p>Study Completion:<br/>January 18, 2022</p> <p>First Posted:<br/>August 5, 2014</p> <p>Results First Posted:<br/>No Results Posted</p> <p>Last Update Posted:<br/>February 11, 2021</p> | <ul style="list-style-type: none"> <li>•City of Hope Comprehensive Cancer Center, Duarte, California, United States</li> </ul> |
